# Supplementary material for: Empagliflozin improves insulin sensitivity in patients with recent acute coronary syndrome and newly detected dysglycaemia: Experiences from the randomized, controlled SOCOGAMI trial
Source: PubMed Central journal article supplement (PMC10422806; doi:10.1186/s12933-023-01950-0), 2023-08-11

## Supplemental Material

**Supplemental Table 1.** Indexes of insulin resistance and  $\beta$ -cell function

| <i>Name</i>                                                           | <i>Formula</i>                                                                                                                                                                                                                                                                                       | <i>Ref</i> |
|-----------------------------------------------------------------------|------------------------------------------------------------------------------------------------------------------------------------------------------------------------------------------------------------------------------------------------------------------------------------------------------|------------|
| <b>Indexes of insulin resistance/sensitivity</b>                      |                                                                                                                                                                                                                                                                                                      |            |
| HOMA-IR                                                               | $\frac{G0 \times I0}{22.5}$                                                                                                                                                                                                                                                                          | (1)        |
| HOMA2-IR                                                              | <a href="https://www.dtu.ox.ac.uk/homacalculator/">https://www.dtu.ox.ac.uk/homacalculator/</a> *                                                                                                                                                                                                    | (2)        |
| QUICKI                                                                | $\frac{1}{\log_{10}(I0) + \log_{10}(G0)}$                                                                                                                                                                                                                                                            | (3)        |
| HOMA2-S                                                               | <a href="https://www.dtu.ox.ac.uk/homacalculator/">https://www.dtu.ox.ac.uk/homacalculator/</a> *                                                                                                                                                                                                    | (2)        |
| Stumvoll MCR <sub>120</sub>                                           | $19.240 - 0.281 \times \text{BMI} - 0.00498 \times I120 - 0.333 \times G120$                                                                                                                                                                                                                         | (4)        |
| Matsuda ISI                                                           | $\frac{10,000}{\sqrt{(G0 \times I0) \times (G120 \times I120)}}$                                                                                                                                                                                                                                     | (5, 6)     |
| VAI                                                                   | Men: $\left(\frac{WC}{39.68 + (1.88 \times \text{BMI})}\right) \times \left(\frac{TG}{1.03}\right) \times \left(\frac{1.31}{\text{HDL}}\right)$<br>Women: $\left(\frac{WC}{36.58 + (1.89 \times \text{BMI})}\right) \times \left(\frac{TG}{0.81}\right) \times \left(\frac{1.52}{\text{HDL}}\right)$ | (7, 8)     |
| LAP                                                                   | Men: $(WC - 65) \times (TG)$<br>Women: $(WC - 58) \times (TG)$                                                                                                                                                                                                                                       | (7)        |
| <b>Indexes of insulin secretion/ <math>\beta</math>-cell function</b> |                                                                                                                                                                                                                                                                                                      |            |
| Insulinogenic index                                                   | $(I30 - I0) / (G30 - G0)$                                                                                                                                                                                                                                                                            | (9, 10)    |
| First phase Stumvoll                                                  | $1,283 + 1.829 \times I30 - 138.7 \times G30 + 3.772 \times I0$                                                                                                                                                                                                                                      | (11)       |
| Second phase Stumvoll                                                 | $286 + 0.416 \times I30 - 25.94 \times G30 + 0.926 \times I0$                                                                                                                                                                                                                                        |            |
| Fasting C-peptide index (CPI)<br>(ng/mL, mg/dL)                       | $\frac{Cp0}{G0} \times 100$                                                                                                                                                                                                                                                                          | (12)       |
| Total AUC <sub>Ins/Glu</sub>                                          | $\frac{\text{AUC Insulin}}{\text{AUC Glucose}}$                                                                                                                                                                                                                                                      | (13)       |
| HOMA2- $\beta$                                                        | <a href="https://www.dtu.ox.ac.uk/homacalculator/">https://www.dtu.ox.ac.uk/homacalculator/</a> *                                                                                                                                                                                                    | (2)        |
| Proinsulin/Insulin                                                    | $\frac{\text{Proinsulin}_0}{I0}$                                                                                                                                                                                                                                                                     |            |
| Insulin secretion sensitivity index 2 (ISSI-2)                        | $\frac{\text{Total AUC(Ins/Glu)}}{\text{Matsuda Index}}$                                                                                                                                                                                                                                             | (13, 14)   |

HOMA-IR, QUICKI and Matsuda ISI were calculated from insulin concentrations given in mU/L. QUICKI and PCPI were calculated from glucose concentrations given in mg/dL. All other indexes were derived from the OGTT with insulin concentrations given in pmol/l, and glucose concentration given in mmol/l. VAI and LAP were calculated from triglycerides and HDL in mmol/l.

\* HOMA2 Calculator version 2.2.3 (Diabetes Trials Unit, University of Oxford, Oxford, UK).

AUC, area under the curve; BMI, body mass index; MCR, metabolic clearance rate; G0, fasting plasma glucose; G120, 2-hour post-load glucose; HDL, high-density lipoprotein; HOMA-IR, homeostasis model assessment-insulin resistance; I0, fasting plasma insulin; I120, 2-hour post-load insulin; IGI, Integrated glucose-insulin; ISI, insulin sensitivity index; LAP, lipid accumulation product; Proinsulin<sub>0</sub>, fasting proinsulin; QUICKI, quantitative insulin sensitivity check index; TG= triglycerides; VAI= visceral adiposity index; WC, waist circumference.

**Supplemental Table 2.** Insulin, C-peptide and Proinsulin at the three different time points in empagliflozin vs placebo treated patients.

| Factor                           | Empagliflozin<br>(n=20) | Placebo<br>(n=22) | P*          | P <sub>1</sub> |
|----------------------------------|-------------------------|-------------------|-------------|----------------|
| <b>Baseline</b>                  |                         |                   |             |                |
| FPG (mmol/L)                     | 6.2 (6.0, 7.2)          | 6.3 (6.0, 6.7)    |             |                |
| 30min-PG (mmol/L)                | 10.3 (9.4, 11.3)        | 9.9 (9.1, 11.4)   |             |                |
| 2h-PG (mmol/L)                   | 10.7 (8.7, 12.2)        | 9.7 (8.6, 12.3)   |             |                |
| Fasting insulin (μIU/mL)         | 13 (9.7, 15)            | 12 (8.4, 18)      |             |                |
| 30min-insulin (μIU/mL)           | 62 (33, 89)             | 58.5 (36, 87.5)   |             |                |
| 2h-insulin (μIU/mL)              | 103 (77, 177)           | 89 (84, 195)      |             |                |
| Fasting proinsulin (pmol/L)      | 13 (9.4, 17)            | 10.5 (8.4, 18)    |             |                |
| Fasting C-peptide (ng/mL)        | 1.05 (0.89, 1.4)        | 1.05 (0.78, 1.3)  |             |                |
| HbA1c (mmol/mol)                 | 41 (39, 45)             | 42 (40, 47)       |             |                |
| Fasting mannose (μmol/L)         | 92.7 (82.3, 97.6)       | 86.1 (76.3, 90.1) |             |                |
| <b>On treatment (7 months)</b>   |                         |                   |             |                |
| FPG (mmol/L)                     | 5.6 (5.3, 6.1)          | 6.2 (5.8, 6.9)    | <b>0.02</b> |                |
| 30min-PG (mmol/L)                | 9.1 (8.8, 9.5)          | 9.4 (8.5, 11.2)   | 0.30        |                |
| 2h-PG (mmol/L)                   | 9.7 (8.5, 10.6)         | 11.0 (8.9, 12.0)  | 0.06        |                |
| Fasting insulin (μIU/mL)         | 12.5 (5, 15)            | 12 (8.05, 20.5)   | 0.29        |                |
| 30min-insulin (μIU/mL)           | 59 (39, 64)             | 41 (31, 58)       | 0.31        |                |
| 2h-insulin (μIU/mL)              | 68 (48, 92)             | 92 (64, 152)      | <b>0.02</b> |                |
| Fasting proinsulin (ng/mL)       | 9.6 (4.6, 13)           | 9.3 (6.6, 18)     | 0.36        |                |
| Fasting C-peptide (ng/mL)        | 0.95 (0.71, 1.15)       | 0.94 (0.78, 1.3)  | 0.51        |                |
| HbA1c (mmol/mol)                 | 42 (39, 44.5)           | 42 (40, 45)       | 0.88        |                |
| Fasting mannose (μmol/L)         | 83.8 (75.1, 91.7)       | 79.5 (69.0, 94.8) | 0.53        |                |
| <b>Off treatment (10 months)</b> |                         |                   |             |                |
| FPG (mmol/L)                     | 6.0 (5.5, 6.4)          | 6.2 (5.8, 6.8)    | 0.26        | <b>0.039</b>   |
| 30min-PG (mmol/L)                | 9.8 (8.8, 11.0)         | 10.3 (9.5, 11.2)  | 0.30        | 0.73           |
| 2h-PG (mmol/L)                   | 11.2 (8.5, 12.3)        | 10.2 (8.1, 12.5)  | 0.85        | 0.10           |
| Fasting insulin (μIU/mL)         | 12 (8.8, 15)            | 13 (8.7, 18.5)    | 0.55        | 0.25           |
| 30min-insulin (μIU/mL)           | 65 (41, 87)             | 58 (34, 66)       | 0.17        | 0.66           |
| 2h-insulin (μIU/mL)              | 103 (68, 129)           | 78 (59, 178)      | 0.69        | <b>0.008</b>   |
| Fasting C-peptide (ng/mL)        | 0.98 (0.74, 1.2)        | 1 (0.84, 1.3)     | 0.78        | <b>0.048</b>   |
| HbA1c (mmol/mol)                 | 43.5 (39, 46)           | 44 (39, 46)       | 0.95        | 0.99           |
| Fasting mannose (μmol/L)         | 84.6 (79.5, 92.6)       | 85.5 (72.3, 94.0) | 0.86        | 0.57           |

Data are median (Q1, Q3).

\*P-value by Mann-Whitney U-test.

•P<sub>1</sub> = P for interaction between treatment allocation and time of visit in the repeated measures ANOVA model

**Supplemental Figure 1.** Mannose levels at the three time points in the empagliflozin and placebo groups.

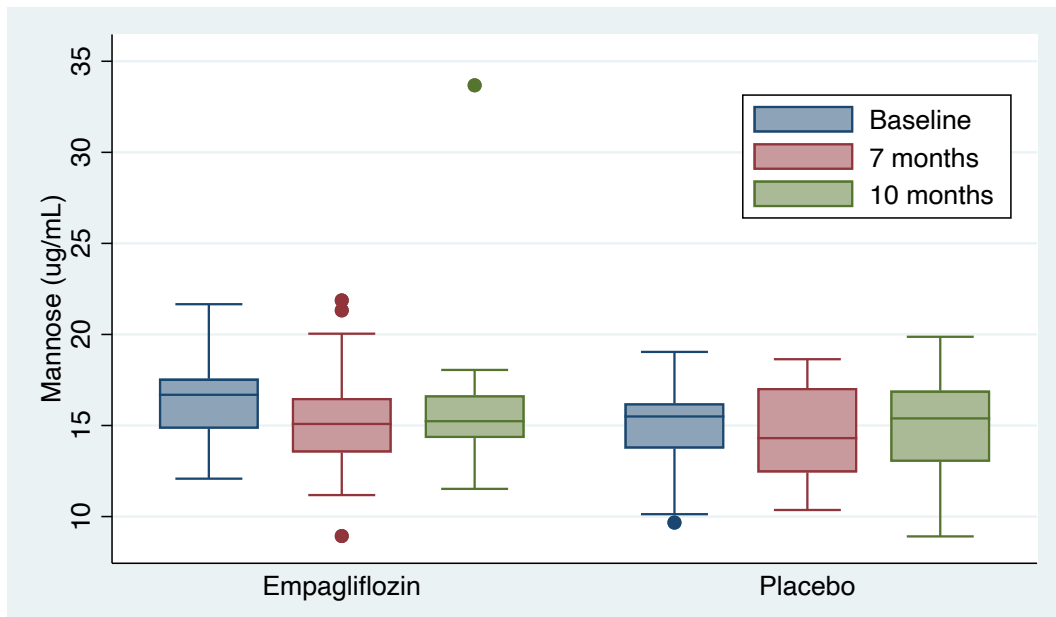

Supplement: 12933_2023_1950_MOESM1_ESM.pdf [file 12933_2023_1950_MOESM1_ESM.pdf]
